# Supplementary material for: Enhancing the performance of tin-based perovskite solar cells through solvent purification of tin iodide
Source: Royal Society of Chemistry journal article supplement (doi:10.1039/d3ta01197f), 2023-01-01
Supplement: d3ta01197f1.pdf [file d3ta01197f1.pdf]

## Supporting Information

### Enhancing the Performance of Tin-Based Perovskite Solar Cells through Solvent Purification of Tin Iodide

Guojun Zeng,<sup>a, b</sup> Dexin Pu,<sup>a</sup> Lishuai Huang,<sup>a</sup> Hongling Guan,<sup>a</sup> Shun Zhou,<sup>a</sup> Jin Zhou,<sup>a</sup>

Weicheng Shen,<sup>a</sup> Guang Li,<sup>a</sup> Guojia Fang,<sup>a\*</sup> Weijun Ke,<sup>a, b\*</sup>

<sup>a</sup> Key Lab of Artificial Micro- and Nano-Structures of Ministry of Education, School  
of Physics and Technology, Wuhan University, Wuhan 430072, P. R. China

<sup>b</sup> Shenzhen Institute, Wuhan University, Shenzhen 518055, China

\*Corresponding Email: gifang@whu.edu.cn; weijun.ke@whu.edu.cn;

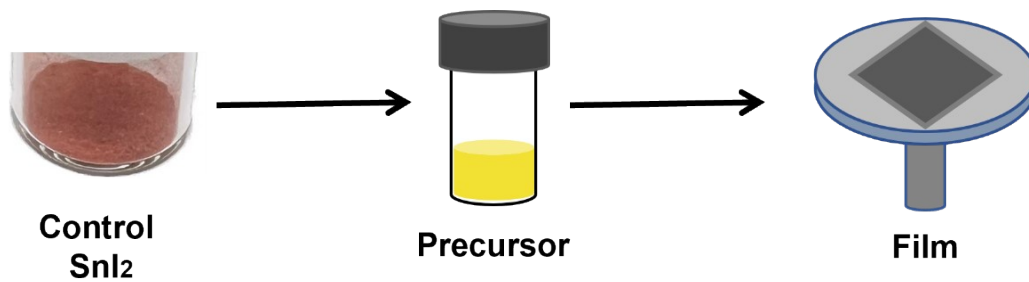

**Figure S1.** (a) Preparation process of commercial (the control one)  $\text{SnI}_2$ -based perovskite films.

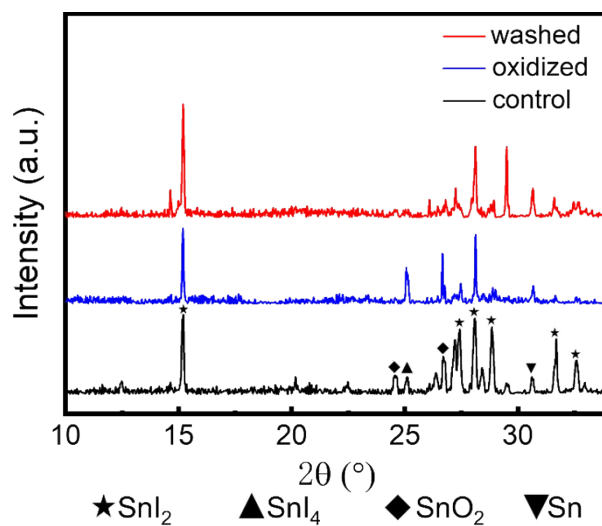

**Figure S2.** XRD patterns of control, oxidized, and toluene-washed  $\text{SnI}_2$ .

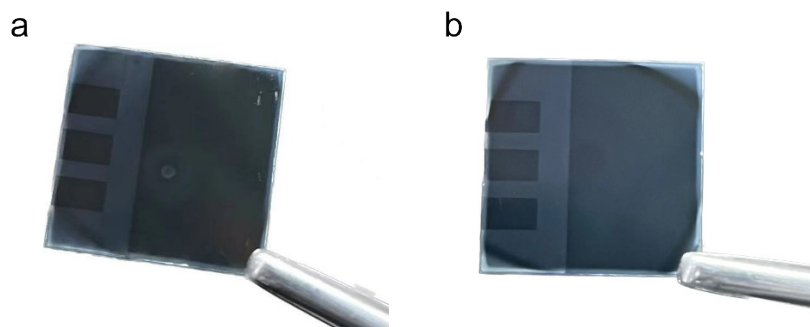

**Figure S3.** Photography of (a) an oxidized  $\text{SnI}_2$ -fabricated perovskite film and (b) a toluene-washed  $\text{SnI}_2$ -fabricated perovskite film.

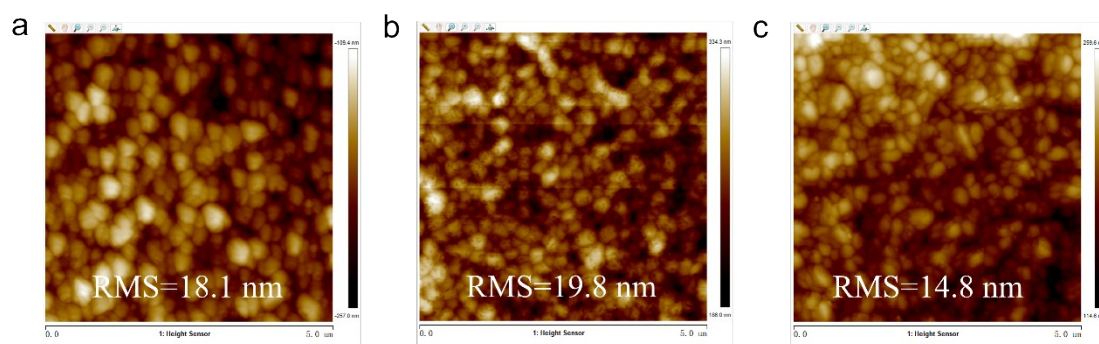

**Figure S4.** AFM images of (a) control  $\text{SnI}_2$ , (b) oxidized  $\text{SnI}_2$ , (c) and toluene-washed  $\text{SnI}_2$ -fabricated perovskite films.

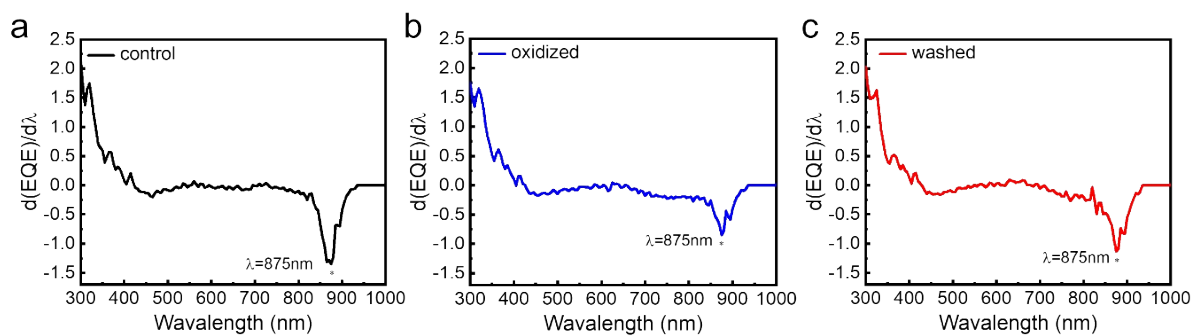

**Figure S5.** Plots of derivative of EQE spectra used to determine bandgaps of (a) control, (b) oxidized, and (c) washed  $\text{SnI}_2$ -based perovskite films.

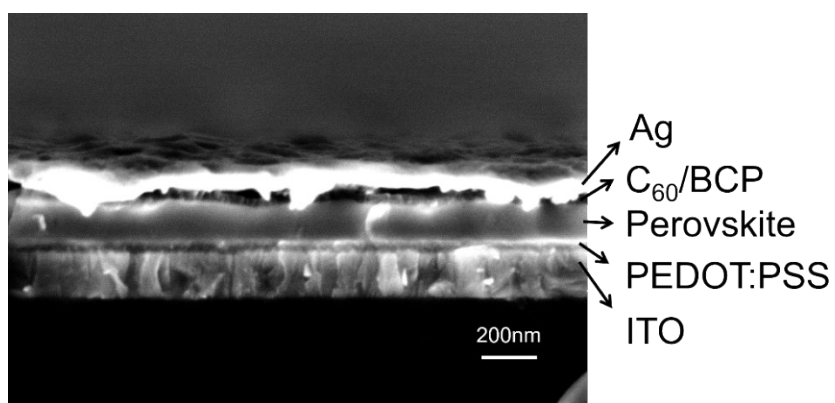

**Figure S6.** A cross-sectional SEM image of a representative  $\text{FASnI}_3$  solar cell fabricated from toluene-washed  $\text{SnI}_2$ .

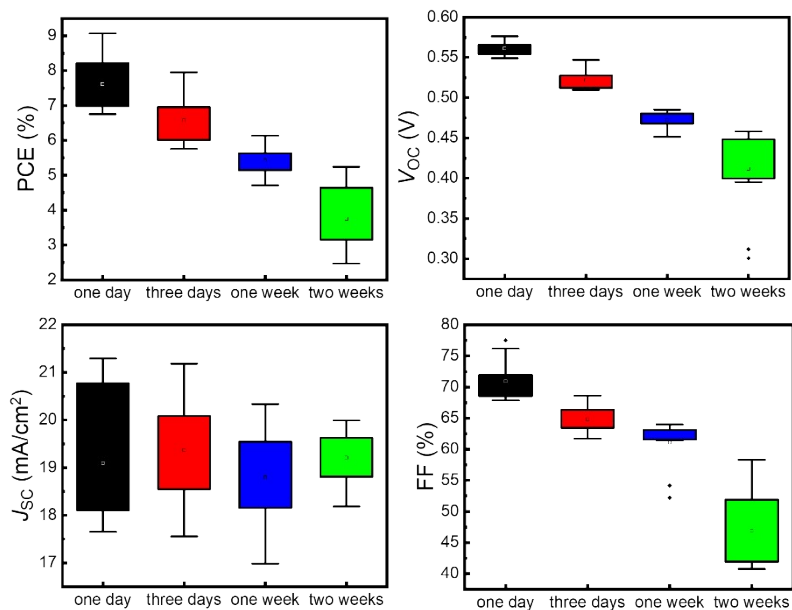

**Figure S7.** Photovoltaic parameters of the solar cells using toluene-washed SnI<sub>2</sub> with air oxidation for one day, three days, one week, and two weeks.

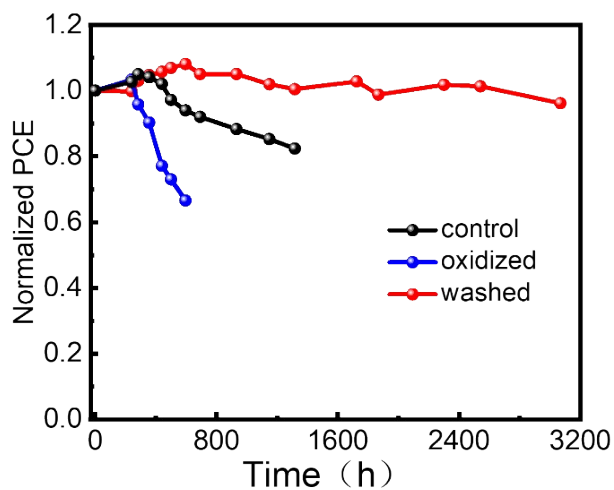

**Figure S8.** Long-term shelf storage stability of control, oxidized, and toluene-washed SnI<sub>2</sub>-fabricated PSCs without encapsulation, which were stored in an N<sub>2</sub>-filled glovebox at room temperature in the dark.

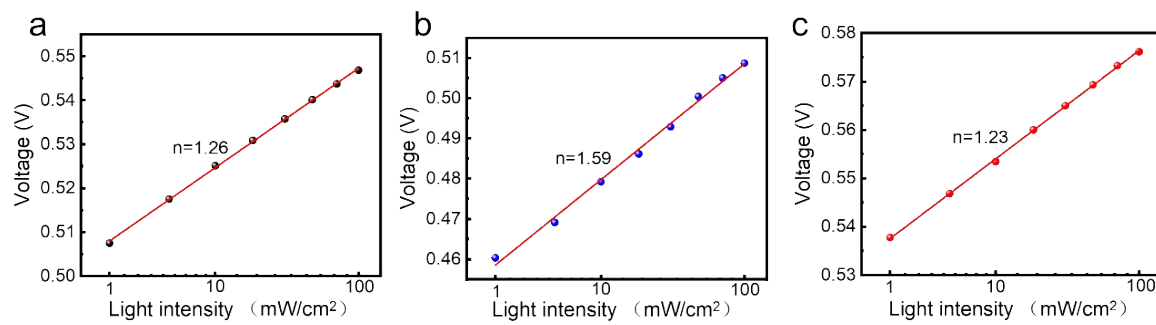

**Figure S9.** Light intensity-dependent  $V_{OC}$  of the solar cells employing (a) control, (b) oxidized, and (c) toluene-washed SnI<sub>2</sub>.
